# Supplementary material for: Methanol–methanol and methanol–water systems: the intermolecular interactions controlling the transition from small clusters to the liquid phase
Source: Royal Society of Chemistry journal article supplement (doi:10.1039/c7cp02919e), 2017-01-01
Supplement: c7cp02919e1.pdf [file c7cp02919e1.pdf]

Margarita Albertí,<sup>\*a</sup> Anna Amat,<sup>b</sup> Antonio Aguilar<sup>a</sup> and Fernando Pirani<sup>c</sup>

## 1 Electronic Supplementary Information for publication, ESI

### 1.1 Determination of $\varepsilon$ and $r_0$ parameters of $V_{nel}$

Extending to the Improved Lennard Jones formulation some guidelines described in Refs. 29 and 30 of the manuscript (see also F. Pirani et al., Int. Rev. Phys. Chem. 2006 **25** 165-199), the  $C_6$  coefficient (in meV Å<sup>6</sup>) for a given A-B pair interaction can be calculated through the following semiempirical equation,

$$C_6 = 11300 \frac{\alpha_A \alpha_B}{\left(\frac{\alpha_A}{N_{effA}}\right)^{1/2} + \left(\frac{\alpha_B}{N_{effB}}\right)^{1/2}} \quad (1)$$

where  $\alpha_A$  and  $\alpha_B$  (in Å<sup>3</sup>) are the effective polarizabilities associated to the interaction groups, whose values are compatible with the total molecular polarizability. In our study,  $\alpha_{CH_3}=2.21$ ,  $\alpha_{OH}=0.98$  and  $\alpha_{H_2O}=1.47$  have been used.  $N_{effA}$  and  $N_{effB}$  are the number of electrons participating to the polarization of groups A and B, respectively. In our study, values of  $N_{eff}$  equal to 7.35, 5.0 and 6.0 for CH<sub>3</sub>, OH and H<sub>2</sub>O, respectively, have been adopted as proper values.

$\varepsilon$  (in meV) is related with  $C_6$  through the following equation,

$$\varepsilon = \frac{C_6}{r_0^6} \quad (2)$$

The  $r_0$  parameter is calculated taking into account many body contributions to the balance of repulsion and attraction, operative between interacting neighbour groups in polyatomic molecules (as for instance CH<sub>3</sub> and OH in the methanol molecule). For such reason we use polarizability components representing an effective size increase of each partner ( $\alpha'$ ). Accordingly,  $r_0$  (in Å) is expressed by,

$$r_0 = 1.767 \frac{(\alpha'_A)^{1/3} + (\alpha'_B)^{1/3}}{(\alpha'_A \alpha'_B)^{0.097}} \quad (3)$$

In our study, for CH<sub>3</sub>OH, the values of  $\alpha'_{CH_3}=2.60$  Å<sup>3</sup> and  $\alpha'_{OH}=1.30$  Å<sup>3</sup> taking into account the many body contributions to the repulsion, have been considered, while for the smaller H<sub>2</sub>O, for which only one interaction center has been considered,  $\alpha'_{H_2O} = \alpha_{H_2O}=1.47$  Å<sup>3</sup> is the simple global molecular polarizability.

**Table 1** Cartesian coordinates (Å) and punctual charges (a.u.) calculated in vacuo and in solvent.

| Atoms | x         | y         | z         | $q_{invacuo}$ | $q_{insolvent}$ |
|-------|-----------|-----------|-----------|---------------|-----------------|
| C     | -0.045624 | 0.653500  | 0.0       | 0.238935      | 0.261339        |
| O     | -0.045624 | -0.744428 | 0.0       | -0.692643     | -0.768162       |
| H     | -1.076814 | 0.975862  | 0.0       | 0.048408      | 0.040016        |
| H     | 0.439103  | 1.060649  | 0.882635  | -0.010685     | 0.000654        |
| H     | 0.439103  | 1.060649  | -0.882635 | -0.010685     | 0.000654        |
| H     | 0.837346  | -1.064238 | 0.0       | 0.426670      | 0.46452         |

On the top panel of the figure, where the evolution of the distance from the O atom of water and the H atom of the OH group of methanol is represented along the trajectory, it can be observed that at the beginning of the simulation, methanol acts as a H-donor. Earlier, after about 0.2 ns from the beginning of the simulation, frequent isomerizations are observed. Such dynamical behavior can be also interpreted from the middle and lower panels of the Figure. In fact, the middle panel of the figure shows that the distance from the O atom of methanol and one of the H atoms of water, oscillates from values lower than 2.0 Å to values higher than 4.0 Å, indicating that, along the trajectory, water acts as a H-donor and as H-acceptor. Such behavior is also reflected in the lower panel of the figure where the angle  $\gamma$  takes values in the 0°-180° range.

<sup>a</sup> Address, IQTCUB, Departament de Ciència de Materials i Química Física, Universitat de Barcelona, 08028 Barcelona, Spain. . Fax: +34 934021231; Tel: +34 934039387; E-mail: m.alberti@ub.edu

<sup>b</sup> Address, Computational Laboratory for Hybrid/Organic Photovoltaics (CLHYO), CNR-ISTM, Via Elce di Sotto 8, 06123 Perugia, Italy

<sup>c</sup> Address, Dipartimento di Chimica, Biologia e Biotecnologie, Università di Perugia, 06123 Perugia and Istituto di Nanotecnologia (CNR, NANOTEC), 70126 Bari, Italy

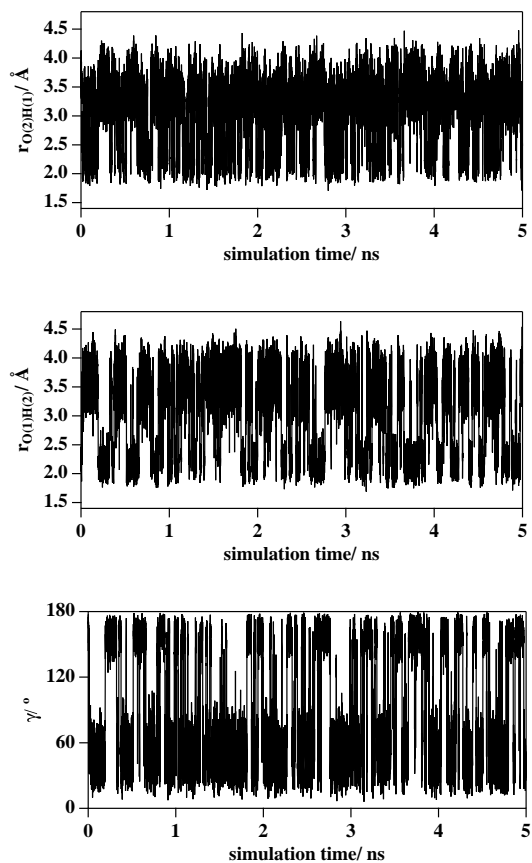

**Figure 1** Evolution of the distance from the O atom of water and the H atom of the OH group of methanol (top panel), of the distance from the O atom of methanol and one of the H atoms of water (middle panel) and of the angle involving the OH bond of methanol and the O atom of water, represented by  $\gamma$  (lower panel) along a MD simulation performed at  $T= 185$  K.

**Table 2** Number of molecules of  $\text{CH}_3\text{OH}$  ( $N_{\text{CH}_3\text{OH}}$ ) and of  $\text{H}_2\text{O}$  ( $N_{\text{H}_2\text{O}}$ ) and fraction molar of methanol ( $x_{\text{CH}_3\text{OH}}$ )

|                            |       |       |       |       |       |       |       |       |       |
|----------------------------|-------|-------|-------|-------|-------|-------|-------|-------|-------|
| $N_{\text{CH}_3\text{OH}}$ | 279   | 578   | 861   | 1144  | 1405  | 1661  | 1936  | 2209  | 2472  |
| $N_{\text{H}_2\text{O}}$   | 2465  | 2166  | 1883  | 1600  | 1339  | 1083  | 808   | 535   | 272   |
| $x_{\text{CH}_3\text{OH}}$ | 0.102 | 0.211 | 0.314 | 0.417 | 0.512 | 0.605 | 0.705 | 0.805 | 0.901 |
